# Supplementary material for: Application of Natural Deep Eutectic Solvents in the Extraction of Quercetin from Vegetables
Source: PubMed Central journal article supplement (PMC6631864; doi:10.3390/molecules24122300), 2019-06-21
Supplement: molecules-24-02300-s001.pdf [file molecules-24-02300-s001.pdf]

Article

# Application of Natural Deep Eutectic Solvents in the Extraction of Quercetin from Vegetables

Yunliang Dai and Kyung Ho Row \*

Department of Chemistry and Chemical Engineering, Inha University, Incheon 402751, Korea;  
22172312@inha.edu

\* Correspondence: rowkho@inha.ac.kr; Tel.: +82-32-860-7470

Received: 11 June 2019; Accepted: 20 June 2019; Published: 21 June 2019

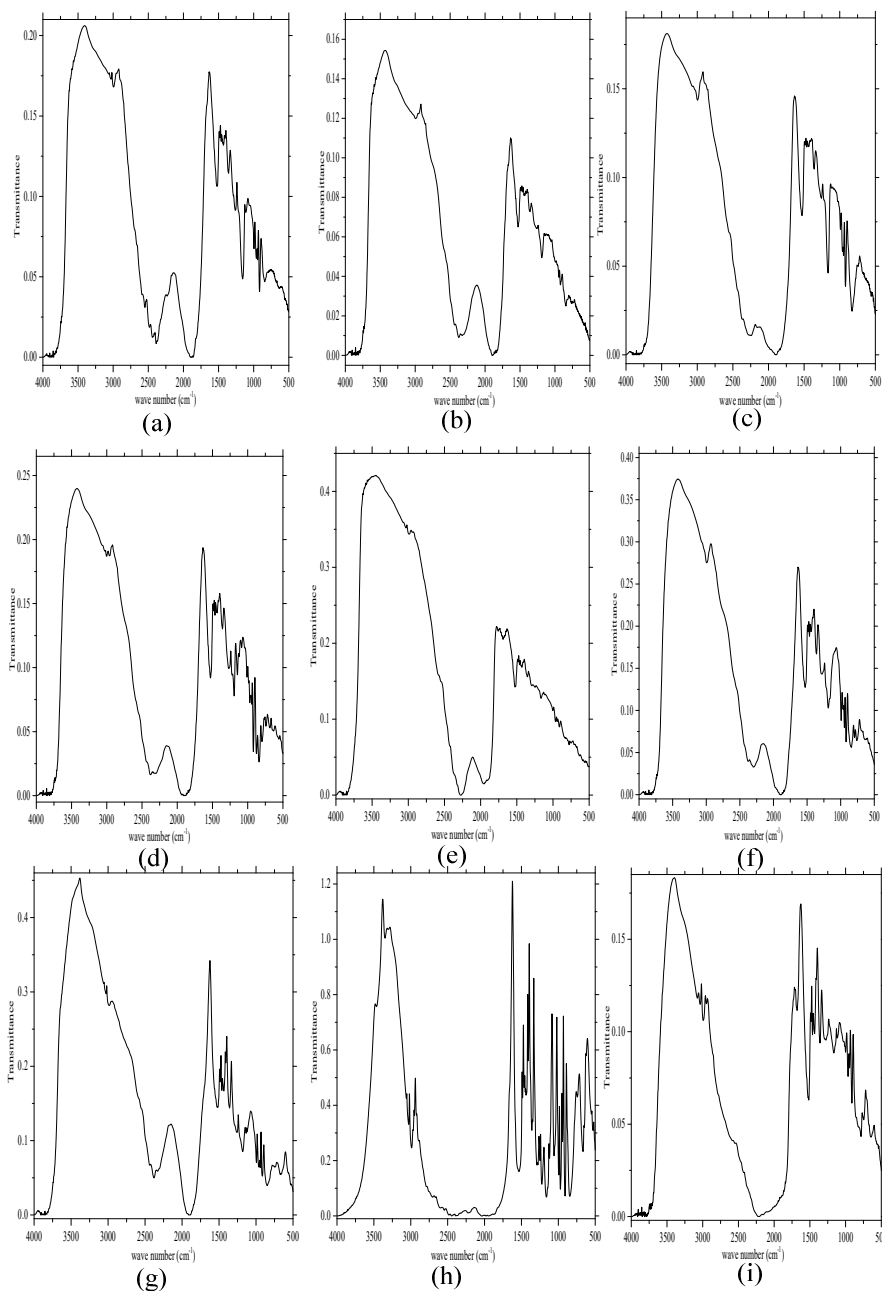

**Figure S1.** FT-IR spectra of betaine based NADESs. a: Bet-Ery, b: Bet-Rib, c: Bet-Xyl, d: Bet-Fuc, e: Bet-Glul, f: Bet-Man, g: Bet-Gal, h: Bet-Mal, and i: Bet-Glua.

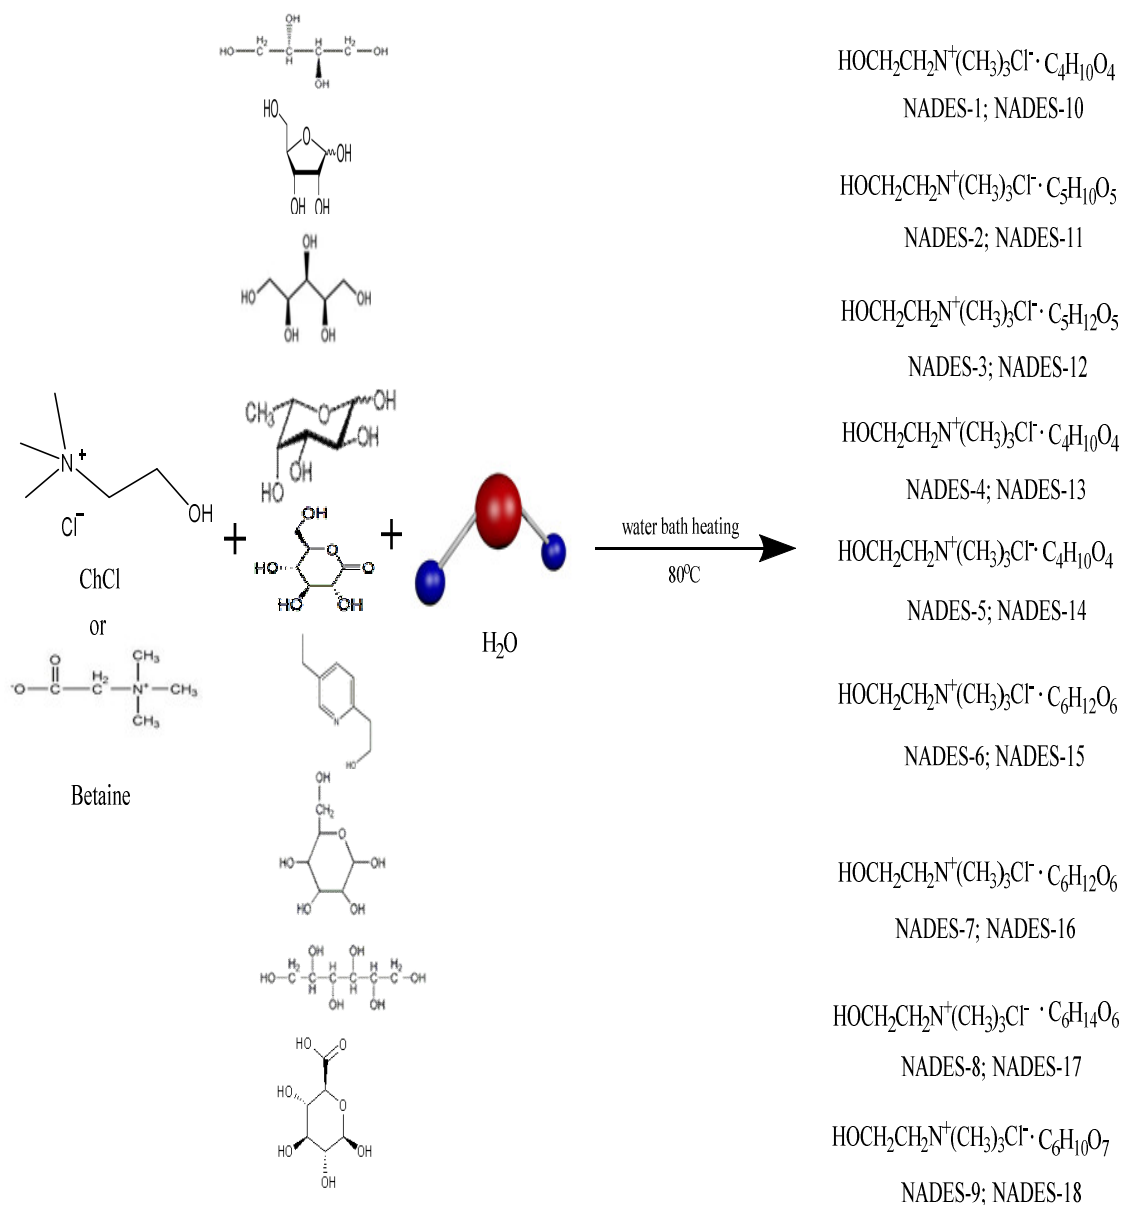

**Figure S2.** Synthetic protocol of the NADESs.

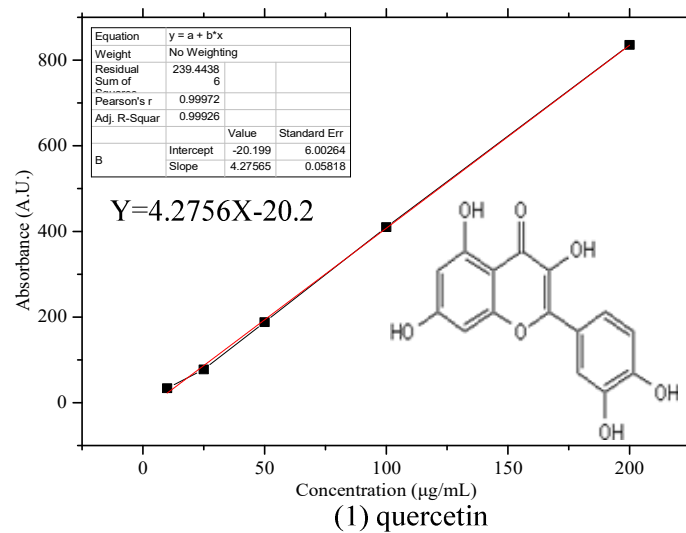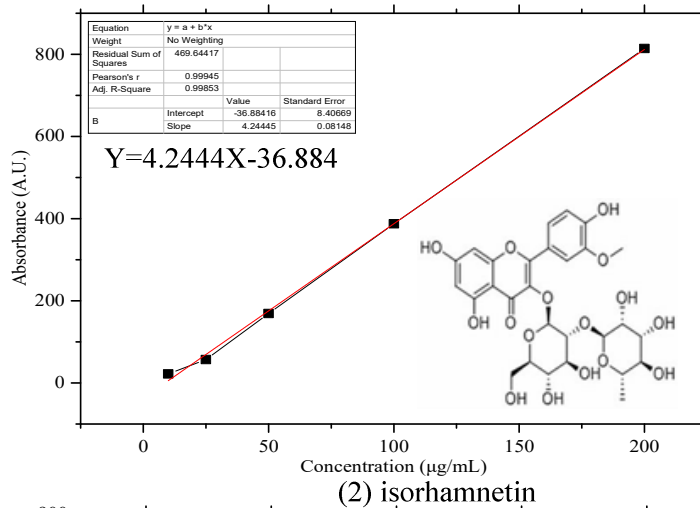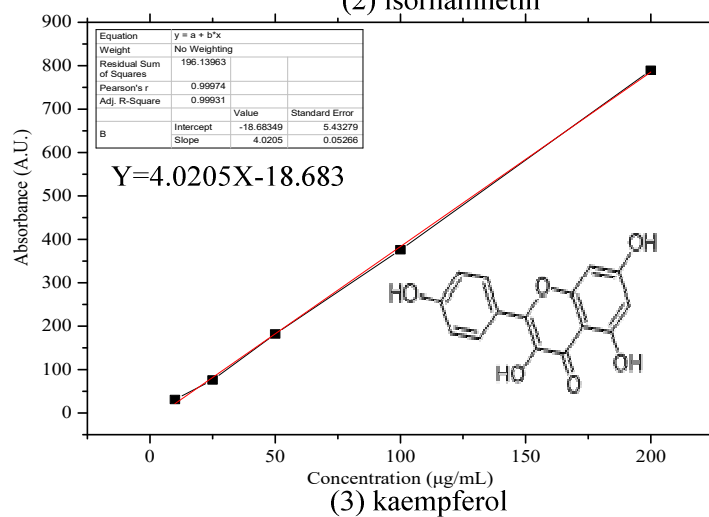

Figure S3. Standard curves and chemical structures of quercetin, isorhamnetin, and kaempferol.

**Table S1.** Abbreviations of the ChCl-based DESs.

| Abbreviations | Component 1 | Component 2                | Component 3      | Molar ratio <sup>a</sup> | Status             | Viscosity <sup>c</sup> (mm <sup>2</sup> s <sup>-1</sup> ) |
|---------------|-------------|----------------------------|------------------|--------------------------|--------------------|-----------------------------------------------------------|
| NADES-1       |             | meso-Erythritol            |                  |                          | Solid <sup>b</sup> | 17.42                                                     |
| NADES-2       |             | D-(-)-Ribose               |                  |                          | Liquid             | 15.64                                                     |
| NADES-3       |             | xylitol                    |                  |                          | Liquid             | 16.24                                                     |
| NADES-4       |             | L-(-)-Fucose               |                  |                          | Liquid             | 14.88                                                     |
| NADES-5       |             | D-(+)-Glucono-1, 5-lactone |                  |                          | Liquid             | 15.72                                                     |
| NADES-6       | ChCl        | D-(+)-Mannose              | H <sub>2</sub> O | 1:1:0.1                  | Liquid             | 20.48                                                     |
| NADES-7       |             | D-(+)-Galactose            |                  |                          | Solid              | 22.16                                                     |
| NADES-8       |             | D-Mannitol                 |                  |                          | Liquid             | 13.24                                                     |
| NADES-9       |             | D-Glucuronic acid          |                  |                          | Liquid             | 13.72                                                     |

a: The best molar ratio, other molar ratios were also studied (including 1:2/2:1/1:1.5) but turned out not to be homogeneous liquids. b: The status of it is solid at room temperature, while at a higher temperature it is liquid. c: The viscosity of it at 25.0 °C (H<sub>2</sub>O: 0.7 mm<sup>2</sup> s<sup>-1</sup>).

**Table S2.** Abbreviations of the betaine-based DESs.

| Abbreviations | Component 1 | Component 2                | Component 3      | Molar ratio | Status | Viscosity (mm <sup>2</sup> s <sup>-1</sup> ) |
|---------------|-------------|----------------------------|------------------|-------------|--------|----------------------------------------------|
| NADES-10      |             | meso-Erythritol            |                  |             | Solid  | 10.32                                        |
| NADES-11      |             | D-(-)-Ribose               |                  |             | Liquid | 9.64                                         |
| NADES-12      |             | xylitol                    |                  |             | Liquid | 9.72                                         |
| NADES-13      |             | L-(-)-Fucose               |                  |             | Liquid | 10.80                                        |
| NADES-14      |             | D-(+)-Glucono-1, 5-lactone |                  |             | Liquid | 11.08                                        |
| NADES-15      | Bet         | D-(+)-Mannose              | H <sub>2</sub> O | 1:1:1       | Liquid | 10.24                                        |
| NADES-16      |             | D-(+)-Galactose            |                  |             | Solid  | 12.16                                        |
| NADES-17      |             | D-Mannitol                 |                  |             | Solid  | 12.64                                        |
| NADES-18      |             | D-Glucuronic acid          |                  |             | Liquid | 11.56                                        |
